# Supplementary material for: Gamma Irradiation and the Radiation Shielding Characteristics: For the Lead Oxide Doped the Crosslinked Polystyrene-b-Polyethyleneglycol Block Copolymers and the Polystyrene-b-Polyethyleneglycol-Boron Nitride Nanocomposites
Source: MDPI journal article supplement (doi:10.3390/polym13193246), 2021-09-24
Supplement: s1 [file s1]

## SUPPLEMENTARY INFORMATION FILE

### S1. Basic Information of Gamma-Irradiation Theory

A photon with beginning intensity  $I_0$  falls to its attenuated  $I$  intensity after exceeding from the sample. This reduction is elucidated via Lambert-Beer's law [43]:

$$\mu = -[\ln(I/I_0)/x] \quad (S1)$$

here  $\mu$  characterizes the attenuation coefficient of the material and  $x$  is the thickness of the absorber. After designating experimental  $\mu$  values, mass attenuation coefficients  $\mu/\rho$  (MACs) of the analyzed materials are computed by dividing the  $\mu$  with the intensity ( $\mu/\rho$ ) of the materials [44]:

$$\mu_m = \frac{\mu}{\rho} = \sum w_i \left( \frac{\mu}{\rho} \right)_i \quad (S2)$$

here  $w_i$  and  $(\mu/\rho)_i$  elucidate the weight component and MACs for each element in the material. Many important terms such as the total atomic and electronic cross-sections, effective atomic number, and electron density can be calculated by this expression.

The total atomic cross-section ( $\sigma_a$ )(cm<sup>2</sup>/atom) can be elucidated as follows [45]:

$$\sigma_a = \frac{(\mu_m)}{N_A \sum_i w_i / A_i} \quad (S3)$$

The total electronic cross-section ( $\sigma_e$ )(cm<sup>2</sup>/electron) can be elucidated as follows [45]:

$$\sigma_e = \frac{1}{N} \sum_i \mu_{mi} \frac{f_i A_i}{Z_i} \quad (S4)$$

here  $Z_i$  is the atomic number and  $f_i$  is the abundance ratio of the element.

Effective atomic number ( $Z_{eff}$ ) of the composites can be ejected from  $\sigma_a$  and  $\sigma_e$  via the following expression [45]:

$$Z_{eff} = \frac{\sigma_a}{\sigma_e} \quad (S5)$$

Electron density ( $N_E$ ) is elucidated as the number of electrons per unit mass of the reacting matter [45]:

$$N_E = (n_{tot} N) \frac{Z_{eff}}{A_{tot}} \quad (S6)$$

The half-value layer (HVL) and tenth value layer (TVL) thickness ensure crucial knowledge concerning radiation protection as well as the influence intensity of radiation at alternative gamma energy regions implemented to the developed composites. The HVL is characterized as the beginning intensity of the same kind of absorber that decreases the restricted gamma-ray intensity to one-half of the main intensity and this layer thickness (cm) is elucidated as follows [46-47]:

$$HVL = X_h = \frac{\ln 2}{\mu} \approx \frac{0.693}{\mu} \quad (S7)$$

The TVL is characterized as the beginning intensity of the same kind of absorber that decreases the restricted gamma-ray intensity to one-tenth of the main intensity and this layer thickness (cm) is elucidated as follows [47]:

$$TVL = X_t = \frac{\ln 10}{\mu} \approx \frac{2.303}{\mu} \quad (S8)$$

The Mean Free Path (MFP) value of a photon is the mean interval energy of a photon that iterates along with a dedicated absorber before incurring an interaction and this

parameter has a crucial impact on the exponential calculation of the gamma photon and this expression can be elucidated as follows [48]:

$$MFP = X_m = \frac{1}{\mu} \quad (S9)$$

Furthermore, when we request to investigate the radiation protection efficiency (RPE) of whichever materials, we can elucidate this value as following [48]:

$$RPE(\%) = \left(1 - \frac{I}{I_0}\right) \times 100 \quad (S10)$$

Experimental uncertainties in the MACs computations can be conjecture as follow: [44,48]:

$$\Delta\mu_m = \frac{1}{\rho x} \sqrt{\left(\frac{\Delta I}{I}\right)^2 + \left(\frac{\Delta I_0}{I_0}\right)^2 + \ln\left(\frac{\Delta I}{I}\right)^2 \left(\frac{\Delta I_0}{I_0}\right)^2} \quad (S11)$$

here  $\rho$  is the density of the sample,  $\Delta I_0$  and  $\Delta I$  is the indefiniteness for initial ( $I_0$ ) and attenuated ( $I$ ) countings.

Assorted programs are existing to compute the MACs to whichever material by substituting its chemical formula or weight fraction of its constituent elements for the broad spacing of energy 1keV to 100GeV. The XCOM computer program was cultivated by Berger and Hubbell [49] to compute the MACs and cross-section of elements, compounds, and mixtures for dissimilar photon energies (1 keV to 100GeV). Additionally, the XCOM from DOS converted to Windows operating system; the design of the windows named WinXCom was developed by Gerward et al. [50,51]. WinXCom program was benefited from this work theoretically to compute  $\mu_m$  by substituting the necessary weight component.

## S2. Gamma Ray Attenuation Measurements

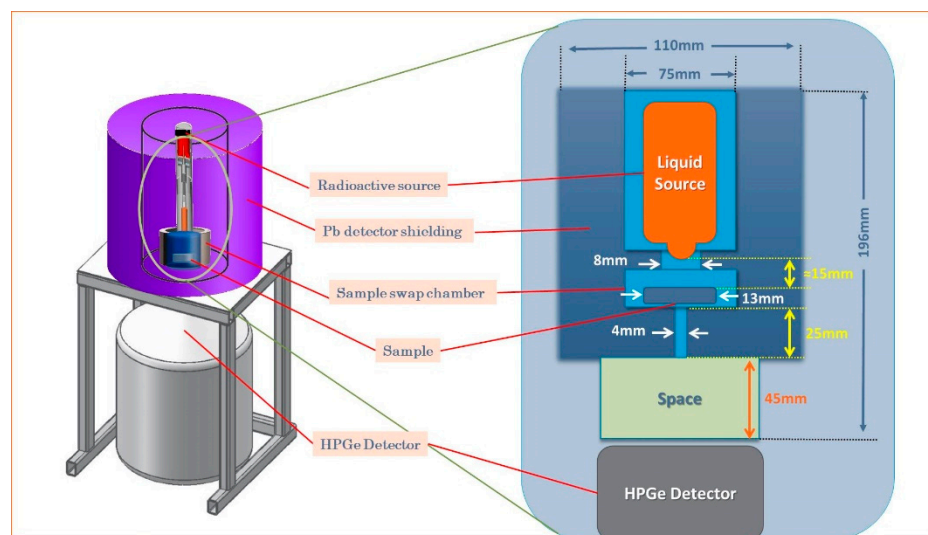

**Figure S1.** Detector schema for gamma irradiation attenuation fruitfulness evaluations.

## S3. Morphological Characterization of the PbO Doped the Crosslinked PS-b-PEG Block Copolymers and the PbO Doped the PS-b-PEG Nanocomposite Materials

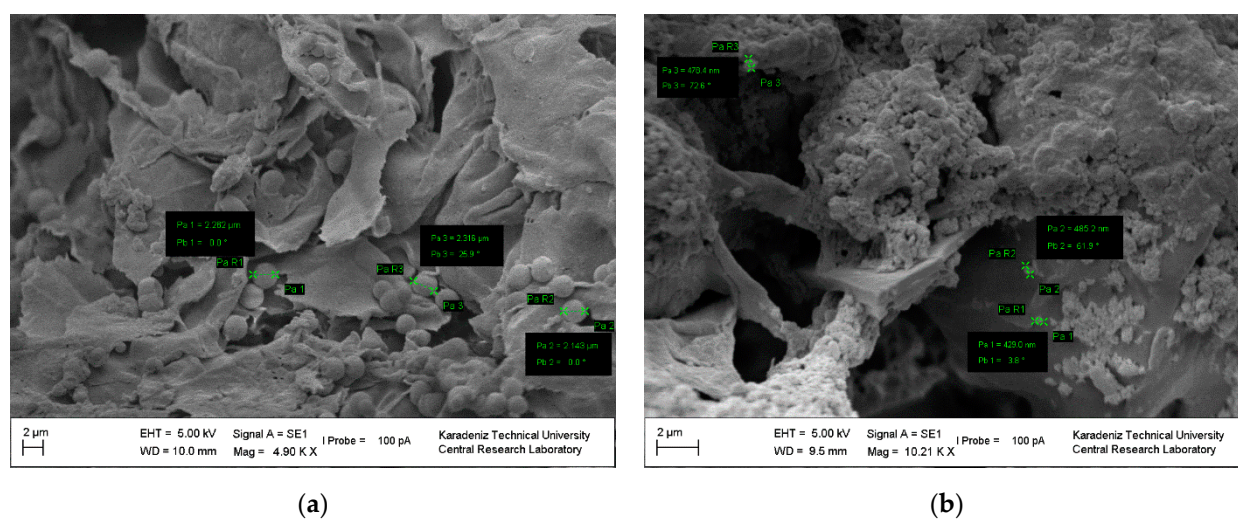

**Figure S2.** SEM photographs of PS-b-PEG (1000) block copolymer (100% PS-PEG (1000)+0% BN+0% PbO in Table 1): (a) PS-PEG (1000)-S0 (4900 × magnification); (b) PS-PEG (1000)-S0 (10,210 × magnification).

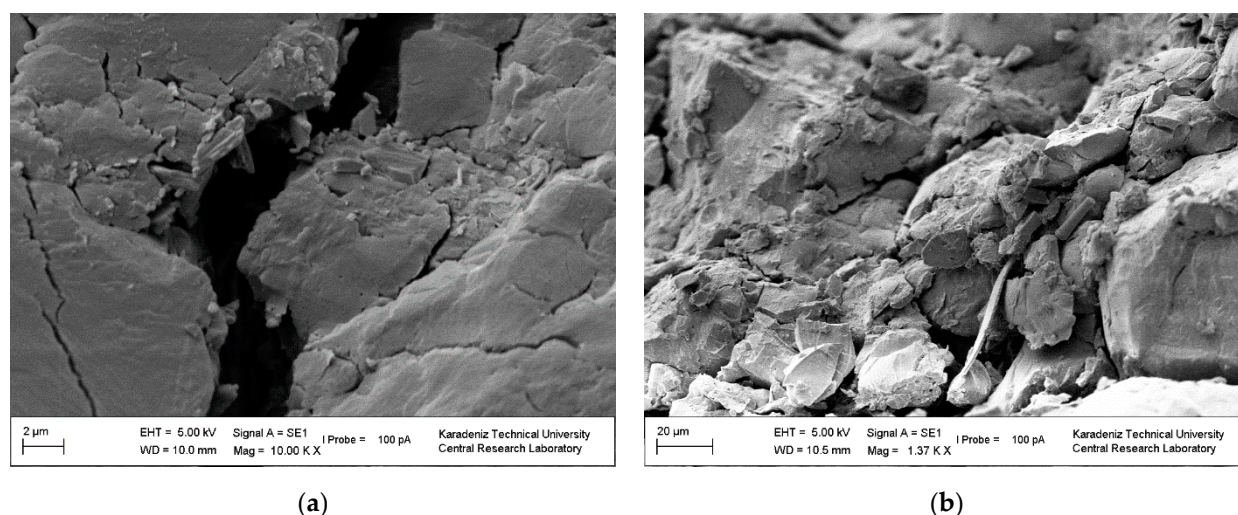

**Figure S3.** SEM photographs of the PS-b-PEG (1500) block copolymer (100% PS-PEG (1500)+0% BN+0% PbO in Table 1): (a) PS-PEG (1500)-S0 (10,000 × magnification); (b) PS-PEG (1500)-S0 (1370 × magnification).

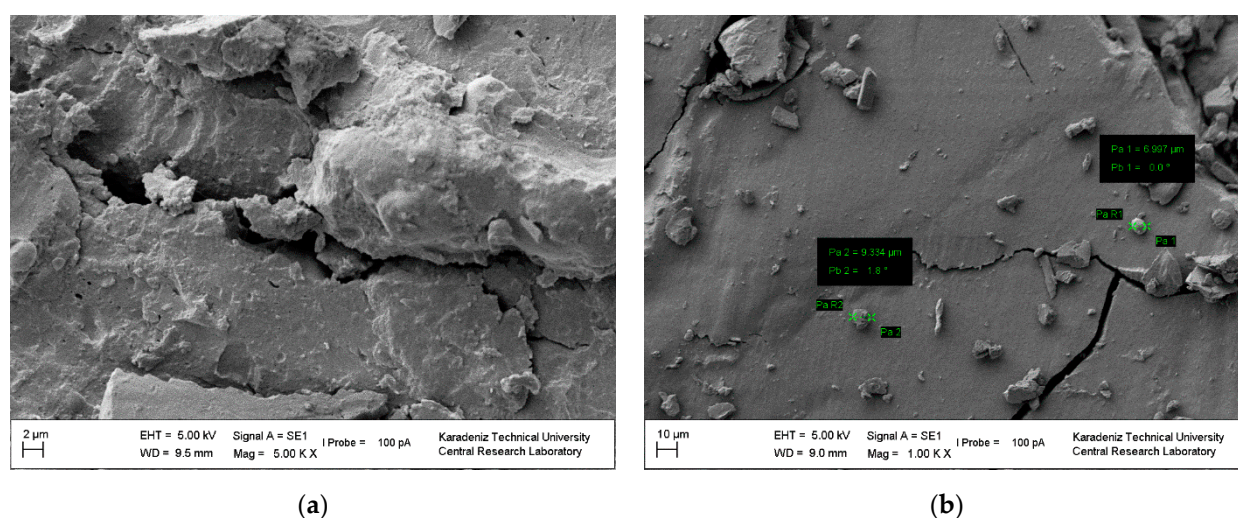

**Figure S4.** SEM photographs of the crosslinked PS-b-PEG (10,000) block copolymer (100% PS-PEG (10,000)+0% BN+0% PbO in Table 1): (a) PS-PEG (10,000)-S0 (5000X magnification); (b) PS-PEG (10,000)-S0 (1000X magnification).



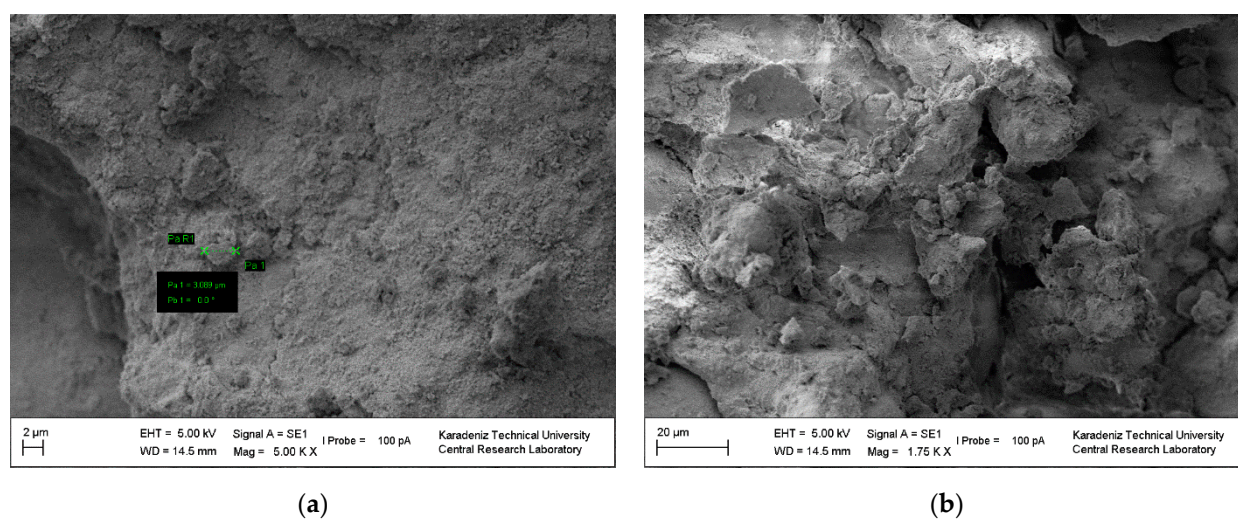

**Figure S5.** SEM photographs of the crosslinked PS-b-PEG (1000) block copolymer+BN nanocomposite (50% PS-PEG (1000)+50% BN+0% PbO in Table 1): (a) PS-PEG (1000)-BN-S0 (5000 × magnification); (b) PS-PEG (1000)-BN-S0 (1750 × magnification).

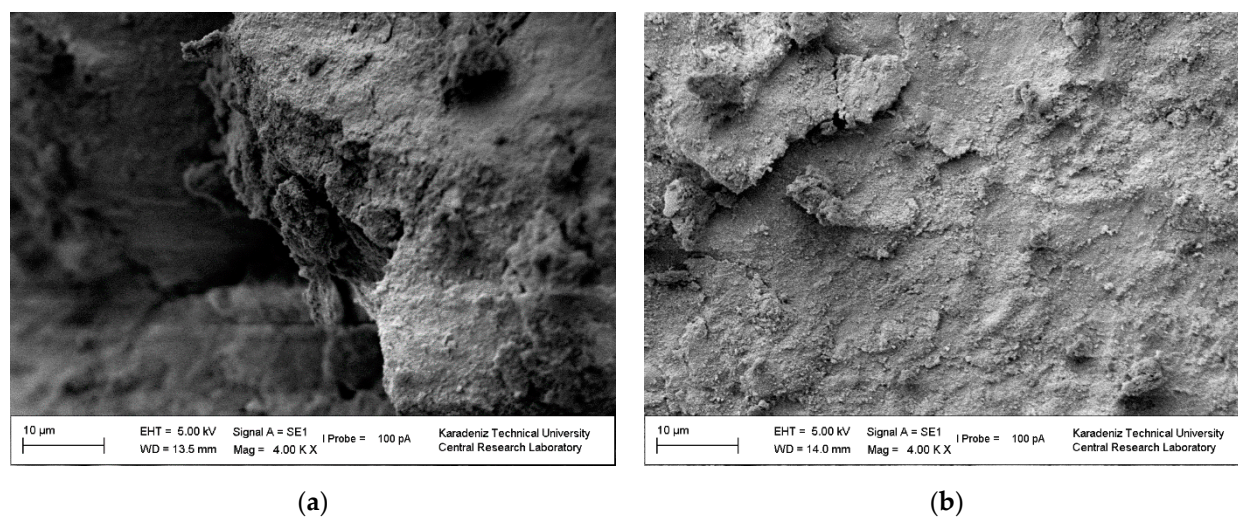

**Figure S6.** SEM photographs of the crosslinked PS-b-PEG (1500) block copolymer+BN nanocomposite (50% PS-PEG (1500)+50% BN+0% PbO in Table 1): (a) PS-PEG (1500)-BN-S0 (4000 × magnification); (b) PS-PEG (1500)-BN-S0 (4000 × magnification).

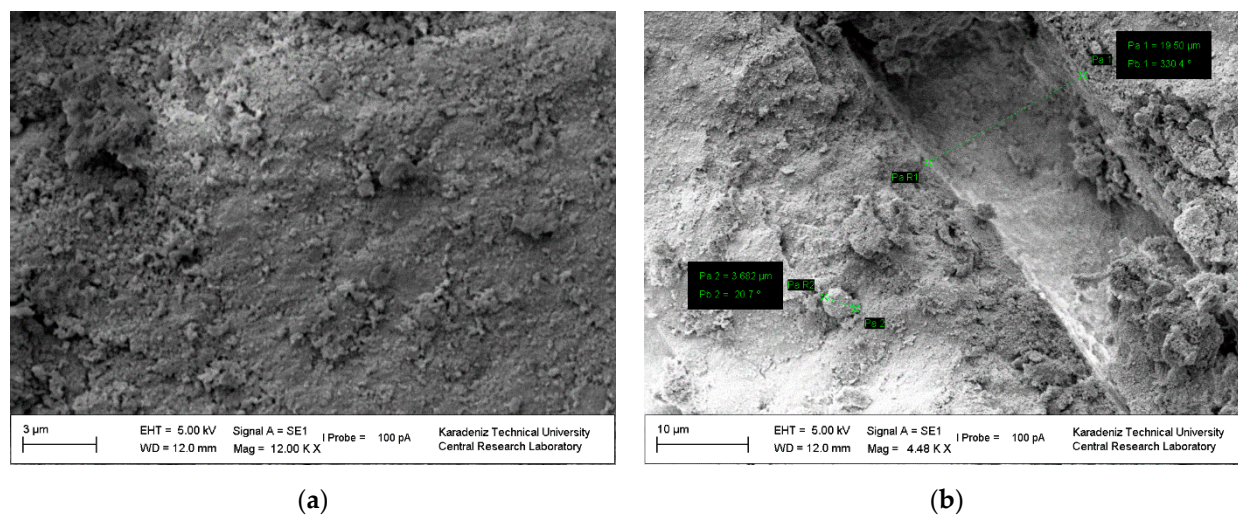



**Figure S7.** SEM photographs of the crosslinked PS-b-PEG (10,000) block copolymer+BN nanocomposite (50% PS-PEG (10,000)+50% BN+0% PbO in Table 1): (a) PS-PEG (10,000)-BN-S0 (12,000 × magnification); (b) PS-PEG (10,000)-BN-S0 (4480 × magnification).

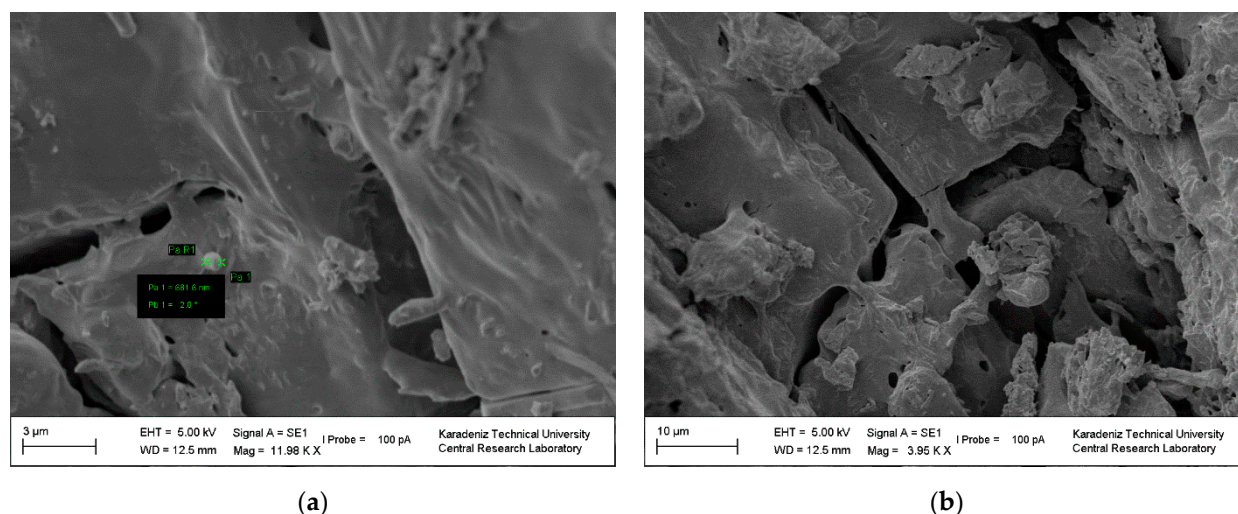

**Figure S8.** SEM photographs of the crosslinked PS-b-PEG (1000) block copolymer+PbO nanocomposite (10% PS-PEG (1000)+0% BN+90% PbO in Table 1): (a) PS-PEG (1000)-S3 (11,980 × magnification); (b) PS-PEG (1000)-S3 (3950 × magnification).

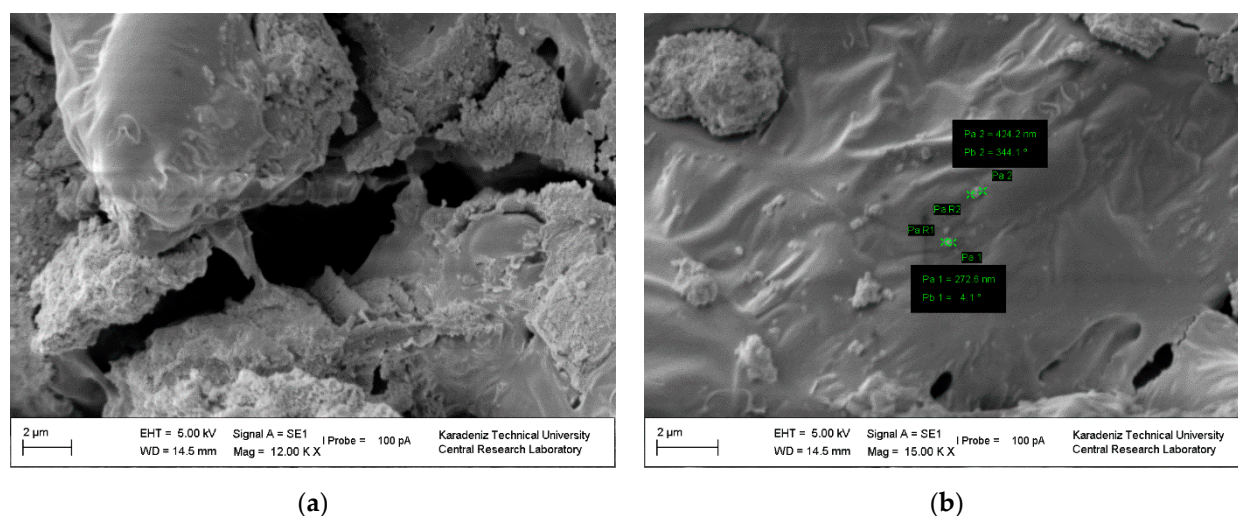

**Figure S9.** SEM photographs of the crosslinked PS-b-PEG (1000) block copolymer+BN+PbO nanocomposite (5% PS-PEG (1000)+5% BN+90% PbO in Table 1): (a) PS-PEG (1000)-BN-S2 (12,000 × magnification); (b) PS-PEG (1000)-BN-S2 (15,000 × magnification).



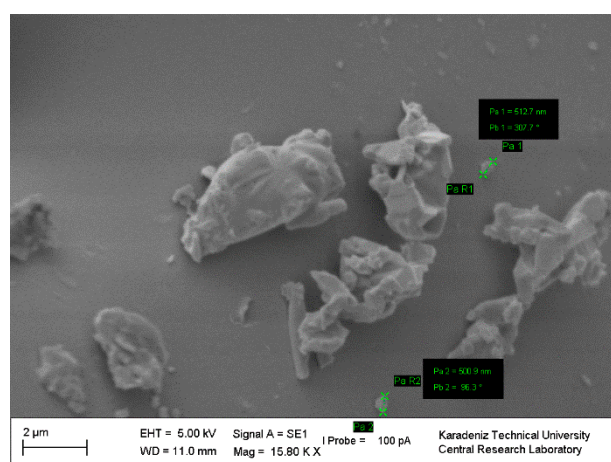

(a)

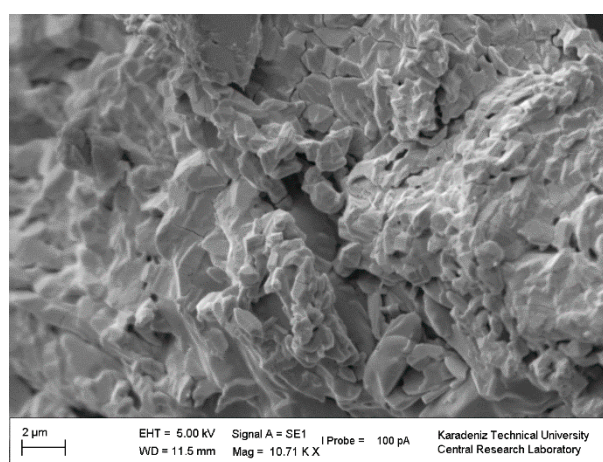

(b)

**Figure S10.** SEM photographs of the crosslinked PS-b-PEG (1500) block copolymer+PbO nanocomposite (10% PS-PEG (1500)+0% BN+90% PbO): (a) PS-PEG (1500)-S3 (15,800 × magnification); (b) PS-PEG (1500)-S3 (10,710 × magnification).

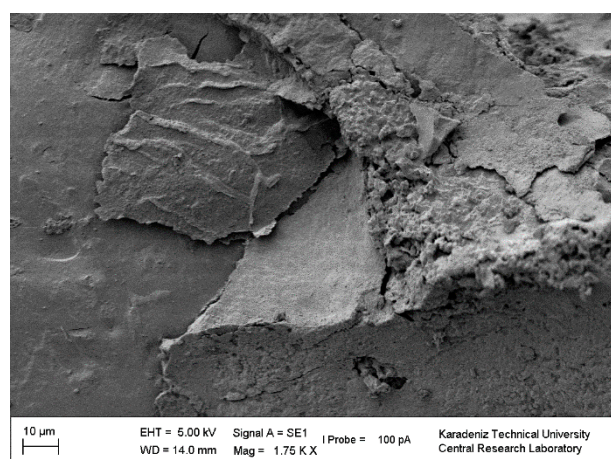

(a)

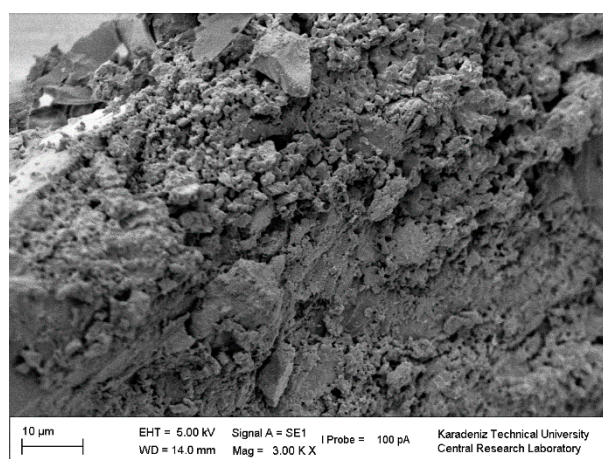

(b)

**Figure S11.** SEM photographs of the crosslinked PS-b-PEG (1500) block copolymer+BN+PbO nanocomposite (5% PS-PEG (1500)+5% BN+90% PbO in Table 1): (a) PS-PEG (1500)-BN-S2 (1750 × magnification); (b) PS-PEG (1500)-BN-S2 (3000 × magnification).

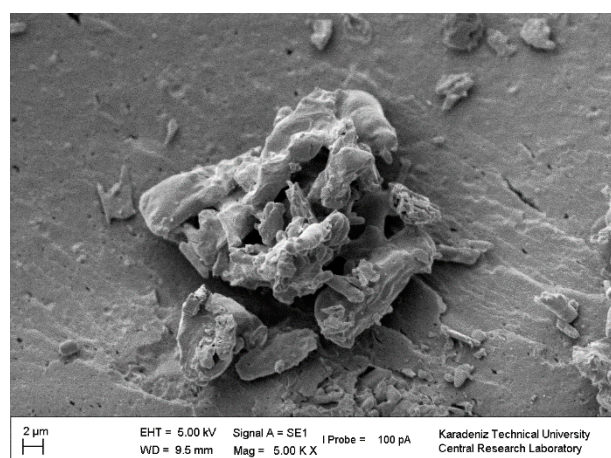

(a)

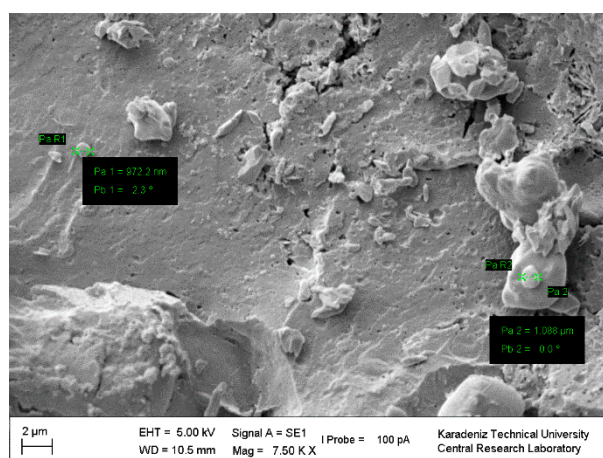

(b)

**Figure S12.** SEM photographs of the crosslinked PS-b-PEG (10,000) block copolymer+PbO nanocomposite (10% PS-PEG (10,000)+0% BN+90% PbO in Table 1): (a) PS-PEG (10,000)-S3 (5000 × magnification); (b) PS-PEG (10,000)-S3 (7500 × magnification).

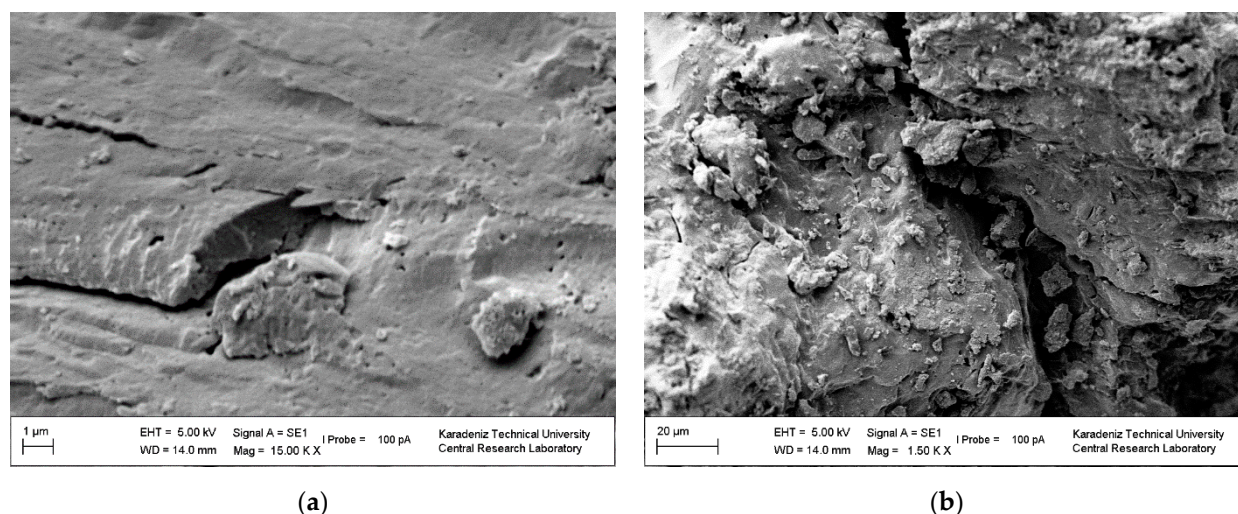

**Figure S13.** SEM photographs of the crosslinked PS-b-PEG (10,000) block copolymer+BN+PbO nanocomposite (5% PS-PEG (10,000)+5% BN+90% PbO in Table 1): (a) PS-PEG (10,000)-BN-S2 (15,000 × magnification); (b) PS-PEG (10,000)-BN-S2 (1500 × magnification).

#### S4. Gamma-Ray Attenuation Characteristics of the PbO Doped the Crosslinked PS-b-PEG Block Copolymers and the PbO Doped the PS-b-PEG-BN Nanocomposite Materials

##### S4.1. Linear ( $\mu_{linear}$ ) and Mass Attenuation ( $\mu_{mass}$ ) Coefficients

**Table S1.** The linear attenuation coefficients (LACs) of the PbO doped the crosslinked PS-b-PEG block copolymers samples.

| Sample ID              | PS-PEG (1000)-S0   |       | PS-PEG (1000)-S1 |       | PS-PEG (1000)-S2 |       | PS-PEG (1000)-S3 |       | PS-PEG (1000)-S4 |       |
|------------------------|--------------------|-------|------------------|-------|------------------|-------|------------------|-------|------------------|-------|
| Photon Energy<br>(keV) | $\mu_L\ (cm^{-1})$ |       |                  |       |                  |       |                  |       |                  |       |
|                        | XCOM               | EXP.  | XCOM             | EXP.  | XCOM             | EXP.  | XCOM             | EXP.  | XCOM             | EXP.  |
| 121.782                | 0.273              | 0.241 | 2.837            | 0.397 | 4.292            | 0.823 | 7.957            | 1.414 | 3.047            | 0.704 |
| 344.279                | 0.193              | 0.203 | 0.345            | 0.221 | 0.453            | 0.325 | 0.764            | 0.473 | 0.172            | 0.196 |
| 778.904                | 0.136              | 0.141 | 0.145            | 0.156 | 0.165            | 0.171 | 0.248            | 0.193 | 0.333            | 0.170 |
| 964.079                | 0.123              | 0.100 | 0.123            | 0.077 | 0.138            | 0.137 | 0.203            | 0.170 | 0.124            | 0.105 |
| 1085.869               | 0.116              | 0.094 | 0.114            | 0.083 | 0.126            | 0.114 | 0.184            | 0.166 | 0.114            | 0.111 |
| 1112.074               | 0.115              | 0.082 | 0.112            | 0.085 | 0.124            | 0.106 | 0.180            | 0.131 | 0.112            | 0.104 |
| 1408.006               | 0.101              | 0.082 | 0.097            | 0.075 | 0.106            | 0.116 | 0.152            | 0.110 | 0.097            | 0.108 |
| Sample ID              | PS-PEG (1500)-S0   |       | PS-PEG (1500)-S1 |       | PS-PEG (1500)-S2 |       | PS-PEG (1500)-S3 |       | PS-PEG (1500)-S4 |       |
| Photon Energy<br>(keV) | $\mu_L\ (cm^{-1})$ |       |                  |       |                  |       |                  |       |                  |       |
|                        | XCOM               | EXP.  | XCOM             | EXP.  | XCOM             | EXP.  | XCOM             | EXP.  | XCOM             | EXP.  |
| 121.782                | 0.265              | 0.282 | 2.875            | 0.493 | 3.659            | 0.672 | 5.666            | 1.039 | 2.996            | 0.590 |
| 344.279                | 0.186              | 0.193 | 0.350            | 0.172 | 0.386            | 0.262 | 0.544            | 0.384 | 0.169            | 0.218 |
| 778.904                | 0.132              | 0.141 | 0.147            | 0.131 | 0.141            | 0.153 | 0.177            | 0.249 | 0.327            | 0.103 |
| 964.079                | 0.119              | 0.111 | 0.125            | 0.091 | 0.118            | 0.106 | 0.145            | 0.210 | 0.122            | 0.101 |
| 1085.869               | 0.112              | 0.085 | 0.115            | 0.093 | 0.107            | 0.089 | 0.131            | 0.151 | 0.112            | 0.099 |

| 1112.074               | 0.111              | 0.068              | 0.114              | 0.095              | 0.105              | 0.091 | 0.128 | 0.149 | 0.110 | 0.096 |
|------------------------|--------------------|--------------------|--------------------|--------------------|--------------------|-------|-------|-------|-------|-------|
| 1408.006               | 0.099              | 0.062              | 0.098              | 0.063              | 0.090              | 0.085 | 0.109 | 0.118 | 0.095 | 0.087 |
| Sample ID              | PS-PEG (10,000)-S0 | PS-PEG( 10,000)-S1 | PS-PEG (10,000)-S2 | PS-PEG (10,000)-S3 | PS-PEG (10,000)-S4 |       |       |       |       |       |
| Photon Energy<br>(keV) | $\mu_L\ (cm^{-1})$ |                    |                    |                    |                    |       |       |       |       |       |
|                        | XCOM               | EXP.               | XCOM               | EXP.               | XCOM               | EXP.  | XCOM  | EXP.  | XCOM  | EXP.  |
| 121.782                | 0.200              | 0.195              | 4.134              | 0.853              | 4.305              | 0.306 | 5.564 | 0.714 | 3.480 | 0.609 |
| 344.279                | 0.141              | 0.172              | 0.503              | 0.396              | 0.454              | 0.271 | 0.534 | 0.387 | 0.410 | 0.340 |
| 778.904                | 0.100              | 0.078              | 0.211              | 0.218              | 0.165              | 0.197 | 0.173 | 0.169 | 0.167 | 0.145 |
| 964.079                | 0.088              | 0.085              | 0.189              | 0.114              | 0.143              | 0.107 | 0.143 | 0.097 | 0.149 | 0.095 |
| 1085.869               | 0.085              | 0.068              | 0.166              | 0.150              | 0.126              | 0.127 | 0.128 | 0.104 | 0.131 | 0.103 |
| 1112.074               | 0.084              | 0.062              | 0.163              | 0.110              | 0.124              | 0.133 | 0.126 | 0.085 | 0.128 | 0.132 |
| 1408.006               | 0.074              | 0.049              | 0.141              | 0.074              | 0.106              | 0.070 | 0.107 | 0.085 | 0.111 | 0.091 |

**Table S2.** The linear attenuation coefficients (LACs) of the PbO doped the PS-b-PEG-BN nanocomposite samples.

| Sample ID              | PS-PEG (1000)-BN-S0   | PS-PEG (1000)-BN-S1   | PS-PEG (1000)-BN-S2   | PS-PEG (1000)-BN-S3   |       |       |       |       |  |
|------------------------|-----------------------|-----------------------|-----------------------|-----------------------|-------|-------|-------|-------|--|
| Photon Energy<br>(keV) | $\mu_L\ (cm^{-1})$    |                       |                       |                       |       |       |       |       |  |
|                        | XCOM                  | EXP.                  | XCOM                  | EXP.                  | XCOM  | EXP.  | XCOM  | EXP.  |  |
| 121.782                | 0.212                 | 0.519                 | 3.736                 | 0.554                 | 5.158 | 0.920 | 4.414 | 0.953 |  |
| 344.279                | 0.150                 | 0.214                 | 0.391                 | 0.196                 | 0.494 | 0.351 | 0.490 | 0.296 |  |
| 778.904                | 0.106                 | 0.156                 | 0.141                 | 0.107                 | 0.160 | 0.195 | 0.188 | 0.226 |  |
| 964.079                | 0.096                 | 0.097                 | 0.118                 | 0.106                 | 0.131 | 0.157 | 0.159 | 0.197 |  |
| 1085.869               | 0.090                 | 0.075                 | 0.108                 | 0.128                 | 0.118 | 0.147 | 0.146 | 0.167 |  |
| 1112.074               | 0.089                 | 0.082                 | 0.106                 | 0.092                 | 0.116 | 0.124 | 0.143 | 0.158 |  |
| 1408.006               | 0.079                 | 0.073                 | 0.090                 | 0.097                 | 0.098 | 0.075 | 0.123 | 0.086 |  |
| Sample ID              | PS-PEG (1500)-BN-S0   | PS-PEG (1500)-BN-S1   | PS-PEG (1500)-BN-S2   | PS-PEG (1500)-BN-S3   |       |       |       |       |  |
| Photon Energy<br>(keV) | $\mu_L\ (cm^{-1})$    |                       |                       |                       |       |       |       |       |  |
|                        | XCOM                  | EXP.                  | XCOM                  | EXP.                  | XCOM  | EXP.  | XCOM  | EXP.  |  |
| 121.782                | 0.250                 | 0.260                 | 4.355                 | 0.998                 | 4.448 | 0.846 | 3.782 | 0.801 |  |
| 344.279                | 0.176                 | 0.220                 | 0.456                 | 0.439                 | 0.426 | 0.326 | 0.420 | 0.371 |  |
| 778.904                | 0.125                 | 0.134                 | 0.165                 | 0.205                 | 0.138 | 0.150 | 0.161 | 0.217 |  |
| 964.079                | 0.113                 | 0.119                 | 0.138                 | 0.158                 | 0.113 | 0.110 | 0.136 | 0.151 |  |
| 1085.869               | 0.106                 | 0.118                 | 0.126                 | 0.143                 | 0.102 | 0.112 | 0.125 | 0.169 |  |
| 1112.074               | 0.105                 | 0.114                 | 0.123                 | 0.164                 | 0.100 | 0.095 | 0.123 | 0.175 |  |
| 1408.006               | 0.093                 | 0.089                 | 0.106                 | 0.120                 | 0.085 | 0.072 | 0.105 | 0.063 |  |
| Sample ID              | PS-PEG (10,000)-BN-S0 | PS-PEG (10,000)-BN-S1 | PS-PEG (10,000)-BN-S2 | PS-PEG (10,000)-BN-S3 |       |       |       |       |  |
| Photon Energy<br>(keV) | $\mu_L\ (cm^{-1})$    |                       |                       |                       |       |       |       |       |  |
|                        | XCOM                  | EXP.                  | XCOM                  | EXP.                  | XCOM  | EXP.  | XCOM  | EXP.  |  |
| 121.782                | 0.204                 | 0.186                 | 3.106                 | 0.717                 | 5.379 | 0.627 | 2.693 | 0.648 |  |
| 344.279                | 0.141                 | 0.123                 | 0.325                 | 0.515                 | 0.515 | 0.375 | 0.299 | 0.262 |  |
| 778.904                | 0.100                 | 0.104                 | 0.118                 | 0.249                 | 0.167 | 0.165 | 0.115 | 0.116 |  |
| 964.079                | 0.090                 | 0.080                 | 0.098                 | 0.127                 | 0.137 | 0.150 | 0.097 | 0.088 |  |
| 1085.869               | 0.085                 | 0.087                 | 0.090                 | 0.127                 | 0.123 | 0.142 | 0.089 | 0.103 |  |



|          |       |       |       |       |       |       |       |       |
|----------|-------|-------|-------|-------|-------|-------|-------|-------|
| 1112.074 | 0.084 | 0.079 | 0.088 | 0.209 | 0.121 | 0.158 | 0.087 | 0.073 |
| 1408.006 | 0.075 | 0.069 | 0.075 | 0.094 | 0.102 | 0.067 | 0.075 | 0.054 |

**Table S3.** The mass attenuation coefficients (MACs) of the PbO doped the crosslinked PS-b-PEG block copolymers samples.

| Sample ID              | PS-PEG (1000)-S0   |       | PS-PEG (1000)-S1   |       | PS-PEG (1000)-S2   |       | PS-PEG (1000)-S3   |       | PS-PEG (1000)-S4   |       |
|------------------------|--------------------|-------|--------------------|-------|--------------------|-------|--------------------|-------|--------------------|-------|
| Photon Energy<br>(keV) | $\mu_m\ (cm^2/g)$  |       |                    |       |                    |       |                    |       |                    |       |
|                        | XCOM               | EXP.  |
| 121.782                | 0.268              | 0.235 | 1.879              | 0.261 | 2.345              | 0.449 | 3.701              | 0.656 | 1.884              | 0.435 |
| 344.279                | 0.188              | 0.198 | 0.229              | 0.145 | 0.247              | 0.177 | 0.355              | 0.220 | 0.106              | 0.121 |
| 778.904                | 0.133              | 0.137 | 0.096              | 0.103 | 0.090              | 0.093 | 0.115              | 0.090 | 0.206              | 0.105 |
| 964.079                | 0.120              | 0.098 | 0.082              | 0.051 | 0.075              | 0.075 | 0.094              | 0.079 | 0.077              | 0.065 |
| 1085.869               | 0.114              | 0.092 | 0.075              | 0.055 | 0.069              | 0.062 | 0.085              | 0.077 | 0.071              | 0.068 |
| 1112.074               | 0.112              | 0.080 | 0.074              | 0.056 | 0.068              | 0.058 | 0.084              | 0.061 | 0.069              | 0.064 |
| 1408.006               | 0.099              | 0.080 | 0.064              | 0.049 | 0.059              | 0.063 | 0.071              | 0.051 | 0.059              | 0.067 |
| Sample ID              | PS-PEG (1500)-S0   |       | PS-PEG (1500)-S1   |       | PS-PEG (1500)-S2   |       | PS-PEG (1500)-S3   |       | PS-PEG (1500)-S4   |       |
| Photon Energy<br>(keV) | $\mu_m\ (cm^2/g)$  |       |                    |       |                    |       |                    |       |                    |       |
|                        | XCOM               | EXP.  |
| 121.782                | 0.250              | 0.283 | 1.463              | 0.320 | 2.274              | 0.429 | 2.879              | 0.486 | 1.678              | 0.370 |
| 344.279                | 0.176              | 0.194 | 0.178              | 0.112 | 0.240              | 0.167 | 0.276              | 0.180 | 0.198              | 0.137 |
| 778.904                | 0.125              | 0.141 | 0.075              | 0.085 | 0.087              | 0.097 | 0.090              | 0.117 | 0.080              | 0.064 |
| 964.079                | 0.113              | 0.111 | 0.067              | 0.059 | 0.075              | 0.067 | 0.074              | 0.098 | 0.072              | 0.063 |
| 1085.869               | 0.106              | 0.086 | 0.059              | 0.061 | 0.067              | 0.057 | 0.066              | 0.070 | 0.063              | 0.062 |
| 1112.074               | 0.105              | 0.068 | 0.058              | 0.062 | 0.066              | 0.058 | 0.065              | 0.069 | 0.062              | 0.060 |
| 1408.006               | 0.093              | 0.062 | 0.050              | 0.041 | 0.056              | 0.054 | 0.055              | 0.055 | 0.053              | 0.055 |
| Sample ID              | PS-PEG (10,000)-S0 |       | PS-PEG (10,000)-S1 |       | PS-PEG (10,000)-S2 |       | PS-PEG (10,000)-S3 |       | PS-PEG (10,000)-S4 |       |
| Photon Energy<br>(keV) | $\mu_m\ (cm^2/g)$  |       |                    |       |                    |       |                    |       |                    |       |
|                        | XCOM               | EXP.  |
| 121.782                | 0.183              | 0.177 | 2.953              | 0.609 | 2.474              | 0.175 | 2.714              | 0.348 | 2.071              | 0.361 |
| 344.279                | 0.129              | 0.156 | 0.360              | 0.282 | 0.261              | 0.155 | 0.261              | 0.189 | 0.244              | 0.202 |
| 778.904                | 0.091              | 0.071 | 0.150              | 0.156 | 0.095              | 0.113 | 0.085              | 0.082 | 0.099              | 0.086 |
| 964.079                | 0.081              | 0.077 | 0.135              | 0.081 | 0.082              | 0.061 | 0.070              | 0.047 | 0.088              | 0.056 |
| 1085.869               | 0.078              | 0.062 | 0.118              | 0.107 | 0.073              | 0.072 | 0.063              | 0.051 | 0.078              | 0.061 |
| 1112.074               | 0.077              | 0.057 | 0.117              | 0.078 | 0.071              | 0.076 | 0.061              | 0.041 | 0.076              | 0.078 |
| 1408.006               | 0.682              | 0.044 | 0.101              | 0.053 | 0.061              | 0.040 | 0.052              | 0.041 | 0.066              | 0.054 |

**Table S4.** The mass attenuation coefficients (MACs) of the PbO doped the crosslinked PS-b-PEG-BN block copolymers samples.

| Sample ID              | PS-PEG (1000)-BN-S0 |       | PS-PEG (1000)-BN-S1 |       | PS-PEG (1000)-BN-S2 |       | PS-PEG (1000)-BN-S3 |       |
|------------------------|---------------------|-------|---------------------|-------|---------------------|-------|---------------------|-------|
| Photon Energy<br>(keV) | $\mu_m (cm^2/g)$    |       |                     |       |                     |       |                     |       |
|                        | XCOM                | EXP.  | XCOM                | EXP.  | XCOM                | EXP.  | XCOM                | EXP.  |
| 121.782                | 0.173               | 0.420 | 1.814               | 0.268 | 2.456               | 0.437 | 2.185               | 0.470 |
| 344.279                | 0.122               | 0.173 | 0.190               | 0.095 | 0.235               | 0.167 | 0.242               | 0.146 |

|                        |                       |                       |                       |                       |       |       |       |       |
|------------------------|-----------------------|-----------------------|-----------------------|-----------------------|-------|-------|-------|-------|
| 778.904                | 0.086                 | 0.126                 | 0.069                 | 0.052                 | 0.076 | 0.093 | 0.093 | 0.112 |
| 964.079                | 0.078                 | 0.079                 | 0.057                 | 0.051                 | 0.062 | 0.075 | 0.079 | 0.097 |
| 1085.869               | 0.073                 | 0.060                 | 0.052                 | 0.062                 | 0.056 | 0.070 | 0.072 | 0.083 |
| 1112.074               | 0.073                 | 0.067                 | 0.051                 | 0.045                 | 0.055 | 0.059 | 0.071 | 0.078 |
| 1408.006               | 0.064                 | 0.059                 | 0.044                 | 0.047                 | 0.047 | 0.036 | 0.061 | 0.042 |
| Sample ID              | PS-PEG (1500)-BN-S0   | PS-PEG (1500)-BN-S1   | PS-PEG (1500)-BN-S2   | PS-PEG (1500)-BN-S3   |       |       |       |       |
| Photon Energy<br>(keV) | $\mu_m (cm^2/g)$      |                       |                       |                       |       |       |       |       |
|                        | XCOM                  | EXP.                  | XCOM                  | EXP.                  | XCOM  | EXP.  | XCOM  | EXP.  |
| 121.782                | 0.145                 | 0.151                 | 2.044                 | 0.468                 | 2.050 | 0.389 | 2.470 | 0.529 |
| 344.279                | 0.103                 | 0.128                 | 0.214                 | 0.206                 | 0.196 | 0.150 | 0.274 | 0.245 |
| 778.904                | 0.073                 | 0.078                 | 0.077                 | 0.096                 | 0.064 | 0.069 | 0.105 | 0.143 |
| 964.079                | 0.066                 | 0.069                 | 0.065                 | 0.074                 | 0.052 | 0.050 | 0.089 | 0.099 |
| 1085.869               | 0.062                 | 0.068                 | 0.059                 | 0.067                 | 0.047 | 0.052 | 0.081 | 0.111 |
| 1112.074               | 0.061                 | 0.066                 | 0.058                 | 0.077                 | 0.046 | 0.043 | 0.080 | 0.116 |
| 1408.006               | 0.054                 | 0.052                 | 0.050                 | 0.056                 | 0.039 | 0.033 | 0.069 | 0.042 |
| Sample ID              | PS-PEG (10,000)-BN-S0 | PS-PEG (10,000)-BN-S1 | PS-PEG (10,000)-BN-S2 | PS-PEG (10,000)-BN-S3 |       |       |       |       |
| Photon Energy<br>(keV) | $\mu_m (cm^2/g)$      |                       |                       |                       |       |       |       |       |
|                        | XCOM                  | EXP.                  | XCOM                  | EXP.                  | XCOM  | EXP.  | XCOM  | EXP.  |
| 121.782                | 0.156                 | 0.142                 | 2.367                 | 0.312                 | 2.456 | 0.286 | 1.556 | 0.374 |
| 344.279                | 0.108                 | 0.094                 | 0.248                 | 0.224                 | 0.235 | 0.171 | 0.173 | 0.151 |
| 778.904                | 0.076                 | 0.080                 | 0.090                 | 0.109                 | 0.076 | 0.075 | 0.066 | 0.067 |
| 964.079                | 0.069                 | 0.061                 | 0.075                 | 0.055                 | 0.062 | 0.068 | 0.056 | 0.051 |
| 1085.869               | 0.065                 | 0.067                 | 0.068                 | 0.055                 | 0.056 | 0.065 | 0.051 | 0.060 |
| 1112.074               | 0.064                 | 0.061                 | 0.067                 | 0.091                 | 0.055 | 0.072 | 0.050 | 0.042 |
| 1408.006               | 0.057                 | 0.052                 | 0.057                 | 0.041                 | 0.047 | 0.031 | 0.043 | 0.031 |

*S4.2. Half-Value Layer (HVL), Tenth Value Layer (TVL), Mean Free Path (MFP), and Radiation Protection Efficiency (RPE)*

**Table S5.** The half value layer (HVL) and the tenth value layer (TVL) values of the PbO doped the crosslinked PS-b-PEG block copolymers samples.

| Sample ID              | PS-PEG (1000)-S0 |         | PS-PEG (1000)-S1 |         | PS-PEG (1000)-S2 |         | PS-PEG (1000)-S3 |         | PS-PEG (1000)-S4 |         |
|------------------------|------------------|---------|------------------|---------|------------------|---------|------------------|---------|------------------|---------|
| Photon Energy<br>(keV) | HVL(cm)          | TVL(cm) |
| 121.782                | 2.881            | 9.569   | 1.746            | 5.799   | 0.842            | 2.798   | 0.490            | 1.629   | 0.984            | 3.268   |
| 344.279                | 3.421            | 11.364  | 3.144            | 10.445  | 2.133            | 7.084   | 1.464            | 4.863   | 3.541            | 11.762  |
| 778.904                | 4.930            | 16.376  | 4.433            | 14.725  | 4.059            | 13.482  | 3.596            | 11.945  | 4.090            | 13.585  |
| 964.079                | 6.926            | 23.009  | 8.945            | 29.715  | 5.070            | 16.841  | 4.072            | 13.527  | 6.585            | 21.874  |
| 1085.869               | 7.381            | 24.518  | 8.332            | 27.679  | 6.092            | 20.236  | 4.169            | 13.848  | 6.259            | 20.791  |
| 1112.074               | 8.432            | 28.010  | 8.169            | 27.137  | 6.524            | 21.671  | 5.306            | 17.625  | 6.669            | 22.155  |
| 1408.006               | 8.458            | 28.097  | 9.249            | 30.725  | 5.963            | 19.809  | 6.282            | 20.869  | 6.407            | 21.282  |
| Sample ID              | PS-PEG (1500)-S0 |         | PS-PEG (1500)-S1 |         | PS-PEG (1500)-S2 |         | PS-PEG (1500)-S3 |         | PS-PEG (1500)-S4 |         |
| Photon Energy<br>(keV) | HVL(cm)          | TVL(cm) |



| 121.782             | 2.457              | 8.162   | 1.407              | 4.673   | 1.031              | 3.426   | 0.667              | 2.217   | 1.176              | 3.905   |
|---------------------|--------------------|---------|--------------------|---------|--------------------|---------|--------------------|---------|--------------------|---------|
| 344.279             | 3.592              | 11.934  | 4.040              | 13.421  | 2.644              | 8.784   | 1.807              | 6.004   | 3.174              | 10.545  |
| 778.904             | 4.929              | 16.375  | 5.286              | 17.558  | 4.546              | 15.103  | 2.779              | 9.233   | 6.758              | 22.450  |
| 964.079             | 6.243              | 20.739  | 7.635              | 25.364  | 6.567              | 21.816  | 3.298              | 10.955  | 6.900              | 22.920  |
| 1085.869            | 8.125              | 26.990  | 7.421              | 24.653  | 7.753              | 25.756  | 4.606              | 15.300  | 7.023              | 23.330  |
| 1112.074            | 10.209             | 33.913  | 7.326              | 24.336  | 7.637              | 25.371  | 4.659              | 15.476  | 7.221              | 23.986  |
| 1408.006            | 11.266             | 37.424  | 11.007             | 36.564  | 8.180              | 27.174  | 5.856              | 19.451  | 7.963              | 26.452  |
| Sample ID           | PS-PEG (10,000)-S0 |         | PS-PEG (10,000)-S1 |         | PS-PEG (10,000)-S2 |         | PS-PEG (10,000)-S3 |         | PS-PEG (10,000)-S4 |         |
| Photon Energy (keV) | HVL(cm)            | TVL(cm) |
| 121.782             | 3.563              | 11.837  | 0.812              | 2.698   | 2.267              | 7.529   | 0.971              | 3.225   | 1.138              | 3.780   |
| 344.279             | 4.032              | 13.393  | 1.752              | 5.820   | 2.554              | 8.483   | 1.789              | 5.943   | 2.038              | 6.771   |
| 778.904             | 8.936              | 29.683  | 3.177              | 10.554  | 3.518              | 11.685  | 4.111              | 13.656  | 4.781              | 15.881  |
| 964.079             | 8.146              | 27.061  | 6.102              | 20.271  | 6.482              | 21.533  | 7.143              | 23.729  | 7.297              | 24.241  |
| 1085.869            | 10.177             | 33.808  | 4.626              | 15.368  | 5.479              | 18.199  | 6.641              | 22.061  | 6.746              | 22.410  |
| 1112.074            | 11.104             | 36.886  | 6.330              | 21.028  | 5.200              | 17.272  | 8.185              | 27.189  | 5.234              | 17.386  |
| 1408.006            | 14.223             | 47.249  | 9.324              | 30.974  | 9.857              | 32.745  | 8.203              | 27.250  | 7.629              | 25.343  |

**Table S6.** The half value layer (HVL) and the tenth value layer (TVL) values of the PbO doped the crosslinked PS-b-PEG-BN block copolymers samples.

| Sample ID           | PS-PEG (1000)-BN-S0   |         | PS-PEG (1000)-BN-S1   |         | PS-PEG (1000)-BN-S2   |         | PS-PEG (1000)-BN-S3   |         |
|---------------------|-----------------------|---------|-----------------------|---------|-----------------------|---------|-----------------------|---------|
| Photon Energy (keV) | HVL(cm)               | TVL(cm) | HVL(cm)               | TVL(cm) | HVL(cm)               | TVL(cm) | HVL(cm)               | TVL(cm) |
| 121.782             | 1.336                 | 4.439   | 1.252                 | 4.159   | 0.753                 | 2.502   | 0.728                 | 2.417   |
| 344.279             | 3.238                 | 10.757  | 3.541                 | 11.762  | 1.975                 | 6.561   | 2.344                 | 7.786   |
| 778.904             | 4.456                 | 14.803  | 6.486                 | 21.545  | 3.558                 | 11.819  | 3.061                 | 10.168  |
| 964.079             | 7.137                 | 23.709  | 6.489                 | 21.557  | 4.407                 | 14.640  | 3.525                 | 11.711  |
| 1085.869            | 9.305                 | 30.909  | 5.413                 | 17.981  | 4.712                 | 15.652  | 4.146                 | 13.772  |
| 1112.074            | 8.414                 | 27.951  | 7.540                 | 25.049  | 5.599                 | 18.600  | 4.376                 | 14.535  |
| 1408.006            | 9.462                 | 31.431  | 7.128                 | 23.677  | 9.260                 | 30.760  | 8.087                 | 26.863  |
| Sample ID           | PS-PEG (1500)-BN-S0   |         | PS-PEG (1500)-BN-S1   |         | PS-PEG (1500)-BN-S2   |         | PS-PEG (1500)-BN-S3   |         |
| Photon Energy (keV) | HVL(cm)               | TVL(cm) | HVL(cm)               | TVL(cm) | HVL(cm)               | TVL(cm) | HVL(cm)               | TVL(cm) |
| 121.782             | 2.662                 | 8.844   | 0.694                 | 2.306   | 0.820                 | 2.722   | 0.865                 | 2.875   |
| 344.279             | 3.150                 | 10.462  | 1.580                 | 5.248   | 2.130                 | 7.075   | 1.868                 | 6.205   |
| 778.904             | 5.171                 | 17.177  | 3.384                 | 11.243  | 4.622                 | 15.353  | 3.199                 | 10.628  |
| 964.079             | 5.849                 | 19.429  | 4.393                 | 14.595  | 6.332                 | 21.034  | 4.606                 | 15.301  |
| 1085.869            | 5.872                 | 19.505  | 4.845                 | 16.096  | 6.170                 | 20.496  | 4.108                 | 13.647  |
| 1112.074            | 6.070                 | 20.165  | 4.237                 | 14.076  | 7.332                 | 24.356  | 3.953                 | 13.132  |
| 1408.006            | 7.801                 | 25.913  | 5.767                 | 19.159  | 9.648                 | 32.050  | 11.010                | 36.574  |
| Sample ID           | PS-PEG (10,000)-BN-S0 |         | PS-PEG (10,000)-BN-S1 |         | PS-PEG (10,000)-BN-S2 |         | PS-PEG (10,000)-BN-S3 |         |
| Photon Energy (keV) | HVL(cm)               | TVL(cm) | HVL(cm)               | TVL(cm) | HVL(cm)               | TVL(cm) | HVL(cm)               | TVL(cm) |

|          |        |        |       |        |        |        |        |        |
|----------|--------|--------|-------|--------|--------|--------|--------|--------|
| 121.782  | 3.721  | 12.359 | 0.967 | 3.213  | 1.105  | 3.672  | 1.070  | 3.553  |
| 344.279  | 5.616  | 18.656 | 1.345 | 4.469  | 1.848  | 6.139  | 2.647  | 8.794  |
| 778.904  | 6.649  | 22.086 | 2.781 | 9.237  | 4.213  | 13.994 | 5.984  | 19.878 |
| 964.079  | 8.689  | 28.863 | 5.480 | 18.203 | 4.630  | 15.378 | 7.854  | 26.090 |
| 1085.869 | 7.957  | 26.433 | 5.472 | 18.176 | 4.868  | 16.172 | 6.702  | 22.264 |
| 1112.074 | 8.702  | 28.906 | 3.322 | 11.036 | 4.375  | 14.533 | 9.521  | 31.628 |
| 1408.006 | 10.112 | 33.592 | 7.347 | 24.405 | 10.350 | 34.381 | 12.765 | 42.404 |

**Table S7.** The mean free path (MFP) and the radiation protection efficiency (RPE) values of the PbO doped the crosslinked PS-b-PEG block copolymers samples.

| Sample ID           | PS-PEG (1000)-S0   |        | PS-PEG (1000)-S1   |        | PS-PEG (1000)-S2   |        | PS-PEG (1000)-S3   |        | PS-PEG (1000)-S4   |        |
|---------------------|--------------------|--------|--------------------|--------|--------------------|--------|--------------------|--------|--------------------|--------|
| Photon Energy (keV) | MFP(cm)            | RPE(%) |
| 121.782             | 4.156              | 10.219 | 2.518              | 16.397 | 1.215              | 28.521 | 0.707              | 32.497 | 1.420              | 33.866 |
| 344.279             | 4.935              | 8.678  | 4.536              | 9.464  | 3.077              | 12.420 | 2.112              | 12.333 | 5.108              | 10.856 |
| 778.904             | 7.112              | 6.105  | 6.395              | 6.809  | 5.855              | 6.731  | 5.188              | 5.218  | 5.900              | 9.470  |
| 964.079             | 9.993              | 4.384  | 12.905             | 3.434  | 7.314              | 5.426  | 5.875              | 4.622  | 9.500              | 5.992  |
| 1085.869            | 10.648             | 4.120  | 12.021             | 3.682  | 8.788              | 4.537  | 6.014              | 4.517  | 9.029              | 6.294  |
| 1112.074            | 12.165             | 3.616  | 11.785             | 3.755  | 9.411              | 4.243  | 7.654              | 3.567  | 9.622              | 5.918  |
| 1408.006            | 12.203             | 3.605  | 13.344             | 3.323  | 8.603              | 4.632  | 9.063              | 3.021  | 9.243              | 6.154  |
| Sample ID           | PS-PEG (1500)-S0   |        | PS-PEG (1500)-S1   |        | PS-PEG (1500)-S2   |        | PS-PEG (1500)-S3   |        | PS-PEG (1500)-S4   |        |
| Photon Energy (keV) | MFP(cm)            | RPE(%) |
| 121.782             | 3.545              | 12.960 | 2.029              | 24.562 | 1.488              | 28.157 | 0.963              | 31.265 | 1.696              | 31.596 |
| 344.279             | 5.183              | 9.057  | 5.829              | 9.348  | 3.815              | 12.100 | 2.607              | 12.930 | 4.579              | 13.119 |
| 778.904             | 7.111              | 6.685  | 7.626              | 7.227  | 6.559              | 7.227  | 4.010              | 8.610  | 9.750              | 6.392  |
| 964.079             | 9.007              | 5.316  | 11.015             | 5.060  | 9.475              | 5.060  | 4.758              | 7.307  | 9.954              | 6.265  |
| 1085.869            | 11.722             | 4.111  | 10.707             | 5.202  | 11.186             | 4.303  | 6.645              | 5.288  | 10.132             | 6.158  |
| 1112.074            | 14.728             | 3.285  | 10.569             | 5.268  | 11.019             | 4.367  | 6.721              | 5.229  | 10.417             | 5.995  |
| 1408.006            | 16.253             | 2.982  | 15.879             | 3.538  | 11.802             | 4.083  | 8.448              | 4.183  | 11.488             | 5.452  |
| Sample ID           | PS-PEG (10,000)-S0 |        | PS-PEG (10,000)-S1 |        | PS-PEG (10,000)-S2 |        | PS-PEG (10,000)-S3 |        | PS-PEG (10,000)-S4 |        |
| Photon Energy (keV) | MFP(cm)            | RPE(%) |
| 121.782             | 5.141              | 11.241 | 1.172              | 23.439 | 3.270              | 11.731 | 1.401              | 24.841 | 1.642              | 26.167 |
| 344.279             | 5.816              | 10.003 | 2.527              | 11.648 | 3.684              | 10.483 | 2.581              | 14.356 | 2.941              | 15.580 |
| 778.904             | 12.891             | 4.644  | 4.584              | 6.601  | 5.075              | 7.725  | 5.931              | 6.522  | 6.897              | 6.966  |
| 964.079             | 11.752             | 5.082  | 8.804              | 3.493  | 9.352              | 4.269  | 10.306             | 3.807  | 10.528             | 4.620  |
| 1085.869            | 14.683             | 4.089  | 6.674              | 4.581  | 7.904              | 5.031  | 9.581              | 4.089  | 9.732              | 4.988  |
| 1112.074            | 16.019             | 3.754  | 9.132              | 3.369  | 7.501              | 5.294  | 11.808             | 3.331  | 7.551              | 6.383  |
| 1408.006            | 20.520             | 2.943  | 13.452             | 2.300  | 14.221             | 2.828  | 11.835             | 3.323  | 11.006             | 4.424  |

**Table S8.** The mean free path (MFP) and the radiation protection efficiency (RPE) values of the PbO doped the crosslinked PS-b-PEG-BN block copolymers samples.

| Sample ID           | PS-PEG (1000)-BN-S0 |        | PS-PEG (1000)-BN-S1 |        | PS-PEG (1000)-BN-S2 |        | PS-PEG (1000)-BN-S3 |        |
|---------------------|---------------------|--------|---------------------|--------|---------------------|--------|---------------------|--------|
| Photon Energy (keV) | MFP(cm)             | RPE(%) | MFP(cm)             | RPE(%) | MFP(cm)             | RPE(%) | MFP(cm)             | RPE(%) |



| 121.782             | 1.928                 | 23.840 | 1.806                 | 22.438 | 1.087                 | 31.930 | 1.050                 | 30.375 |
|---------------------|-----------------------|--------|-----------------------|--------|-----------------------|--------|-----------------------|--------|
| 344.279             | 4.672                 | 10.629 | 5.108                 | 8.594  | 2.850                 | 13.644 | 3.381                 | 10.629 |
| 778.904             | 6.429                 | 7.842  | 9.357                 | 4.787  | 5.133                 | 7.821  | 4.416                 | 8.245  |
| 964.079             | 10.297                | 4.971  | 9.362                 | 4.785  | 6.358                 | 6.363  | 5.086                 | 7.199  |
| 1085.869            | 13.424                | 3.836  | 7.809                 | 5.708  | 6.798                 | 5.964  | 5.981                 | 6.156  |
| 1112.074            | 12.139                | 4.233  | 10.879                | 4.132  | 8.078                 | 5.043  | 6.313                 | 5.843  |
| 1408.006            | 13.651                | 3.773  | 10.283                | 4.366  | 13.359                | 3.081  | 11.667                | 3.205  |
| Sample ID           | PS-PEG (1500)-BN-S0   |        | PS-PEG (1500)-BN-S1   |        | PS-PEG (1500)-BN-S2   |        | PS-PEG (1500)-BN-S3   |        |
| Photon Energy (keV) | MFP(cm)               | RPE(%) | MFP(cm)               | RPE(%) | MFP(cm)               | RPE(%) | MFP(cm)               | RPE(%) |
| 121.782             | 3.841                 | 10.894 | 1.002                 | 33.126 | 1.182                 | 34.154 | 1.249                 | 30.206 |
| 344.279             | 4.544                 | 9.290  | 2.279                 | 16.206 | 3.073                 | 14.851 | 2.695                 | 15.347 |
| 778.904             | 7.460                 | 5.766  | 4.883                 | 7.922  | 6.668                 | 7.141  | 4.616                 | 9.270  |
| 964.079             | 8.438                 | 5.115  | 6.338                 | 6.160  | 9.135                 | 5.264  | 6.645                 | 6.534  |
| 1085.869            | 8.471                 | 5.095  | 6.990                 | 5.602  | 8.901                 | 5.399  | 5.927                 | 7.296  |
| 1112.074            | 8.758                 | 4.933  | 6.113                 | 6.380  | 10.578                | 4.563  | 5.703                 | 7.571  |
| 1408.006            | 11.254                | 3.860  | 8.321                 | 4.728  | 13.919                | 3.487  | 15.884                | 2.787  |
| Sample ID           | PS-PEG (10,000)-BN-S0 |        | PS-PEG (10,000)-BN-S1 |        | PS-PEG (10,000)-BN-S2 |        | PS-PEG (10,000)-BN-S3 |        |
| Photon Energy (keV) | MFP(cm)               | RPE(%) | MFP(cm)               | RPE(%) | MFP(cm)               | RPE(%) | MFP(cm)               | RPE(%) |
| 121.782             | 5.368                 | 9.890  | 1.395                 | 20.438 | 1.595                 | 22.914 | 1.543                 | 33.647 |
| 344.279             | 8.102                 | 6.667  | 1.941                 | 15.157 | 2.666                 | 14.415 | 3.819                 | 15.274 |
| 778.904             | 9.592                 | 5.661  | 4.012                 | 7.644  | 6.078                 | 6.601  | 8.633                 | 7.070  |
| 964.079             | 12.535                | 4.362  | 7.905                 | 3.955  | 6.679                 | 6.025  | 11.331                | 5.433  |
| 1085.869            | 11.480                | 4.753  | 7.894                 | 3.961  | 7.024                 | 5.738  | 9.669                 | 6.337  |
| 1112.074            | 12.554                | 4.355  | 4.793                 | 6.439  | 6.312                 | 6.364  | 13.736                | 4.504  |
| 1408.006            | 14.589                | 3.759  | 10.599                | 2.965  | 14.931                | 2.741  | 18.416                | 3.379  |

Table S9. Comparative informations of PbO doped radiation shielding characteristics.

| Authors                  | Sample Information                                 | Main Consequences                                                                                                                                                                                                                                               |
|--------------------------|----------------------------------------------------|-----------------------------------------------------------------------------------------------------------------------------------------------------------------------------------------------------------------------------------------------------------------|
| This research            | PS-PEG (1000-1500-10,000)-S0,1,2,3,4               | It was observed that the implemented radiation does not influence the structure of the materials and the radiation protection capacities of the samples improved when the PbO or BN, and PS-b-PEG copolymer percentages of the prepared materials were changed. |
|                          | PS-PEG (1000-1500-10,000)-BN-S0,1,2,3              |                                                                                                                                                                                                                                                                 |
| Cinan, Z.M.; et al. [56] | Cement-HB(PAE-b-PCL)-PU Plaster-                   | The values of HVL, TVL, and MFP decrease with an increase in weight fraction of high atomic number elements in the material due to an increase in MACs and intensity. It was observed by Cinan et al. that deduced that when the proportion of the              |
|                          | Lead Oxide PCMs                                    |                                                                                                                                                                                                                                                                 |
|                          | Cement-HB(PAE-b-PCL)-PU Plaster-Arsenic Oxide PCMs |                                                                                                                                                                                                                                                                 |

|                           |                                                                                                     |                                                                                                                                                                                                                                                                                                                                                                                                                                                                                                                                                                                                                                                                                                                                                                                                                                                                                                                                                                   |
|---------------------------|-----------------------------------------------------------------------------------------------------|-------------------------------------------------------------------------------------------------------------------------------------------------------------------------------------------------------------------------------------------------------------------------------------------------------------------------------------------------------------------------------------------------------------------------------------------------------------------------------------------------------------------------------------------------------------------------------------------------------------------------------------------------------------------------------------------------------------------------------------------------------------------------------------------------------------------------------------------------------------------------------------------------------------------------------------------------------------------|
|                           |                                                                                                     | <p>lead and arsenic oxide ingredient in the PCMs is ascent, the absorption proportion and hence the safety qualities of the PCM sample ascents. Their results, the utility of lead oxide doped materials in gamma-ray shielding is greater than that of arsenic oxide doped materials.</p>                                                                                                                                                                                                                                                                                                                                                                                                                                                                                                                                                                                                                                                                        |
| Hassan et al. [28]        | Concrete Incorporation with Two Types of Nano-Lead Compounds                                        | <p>Hassan et al. investigated that the influence of concrete mixing with two kinds of nano-lead composites on its gamma absorbing qualities and they have comprehensively expressed how the gamma attenuation coefficients of nano-lead oxide added concrete change at different energies, the investigation results indicated that the addition of nano-lead oxide to concrete can ascent its mass attenuation coefficients to reach 33% of pure lead plates at 662 keV. PbO is one of the appropriate metal oxides for protection from high-energy gamma rays' harmful effects. It was noticed by Kozlovskiy et al. that the substitution of Pb atoms for W atoms leads to a lessen in the half value layer values by 44%, 65%, and 73% for various lead oxide concentrations and found that an increase in the lead oxide concentration leads to a remarkable decrease in the required density for attenuation by 50% of the density of gamma irradiation.</p> |
| Kozlovskiy et al. [29]    | $0.5\text{Bi}_2\text{O}_3-(0.5-x)\text{WO}_3-x\text{PbO}$ Glasses                                   | <p>Mahmoud et al. observed that the decline in the lead oxide percentage has an unfavorable influence on the mass attenuation coefficients.</p>                                                                                                                                                                                                                                                                                                                                                                                                                                                                                                                                                                                                                                                                                                                                                                                                                   |
| Mahmoud et al. [30]       | $x\text{BaO}-(50-x)\text{PbO}-50\text{P}_2\text{O}_5$<br>( $x = 0, 5, 10, 15, 20, 30, 40, 50$ mol%) | <p>The experimental results illustrated by Mokhtari et al. that the half value later coefficient of the standard concrete strengthened with 5 wt% of nano lead oxide particles was decreased by 64% at 511 keV and 48% at 1332 keV and good harmony was observed among simulation and experimental results and indicated that</p>                                                                                                                                                                                                                                                                                                                                                                                                                                                                                                                                                                                                                                 |
| Mokhtari, K.; et al. [31] | The Ordinary Concrete Reinforced with Different Weight Fractions of PbO Micro/Nanoparticles         |                                                                                                                                                                                                                                                                                                                                                                                                                                                                                                                                                                                                                                                                                                                                                                                                                                                                                                                                                                   |



|                             |                                                                                                                                                                                                                                                                     |                                                                                                                                                                                                                                                                                                                                                                                                                                                                                                                                                                                                                                                                                                                                                                                                                                                                           |
|-----------------------------|---------------------------------------------------------------------------------------------------------------------------------------------------------------------------------------------------------------------------------------------------------------------|---------------------------------------------------------------------------------------------------------------------------------------------------------------------------------------------------------------------------------------------------------------------------------------------------------------------------------------------------------------------------------------------------------------------------------------------------------------------------------------------------------------------------------------------------------------------------------------------------------------------------------------------------------------------------------------------------------------------------------------------------------------------------------------------------------------------------------------------------------------------------|
| Othman, S.A.; [32]          | Lead Oxide on Concrete                                                                                                                                                                                                                                              | the employment of nano lead oxide is more powerful at low gamma energies up to 1MeV.                                                                                                                                                                                                                                                                                                                                                                                                                                                                                                                                                                                                                                                                                                                                                                                      |
| Qian, Z.; et al. [33]       | Sm <sup>3+</sup> Doped (60-x)B <sub>2</sub> O <sub>3</sub> -xPbO-14TeO <sub>2</sub> -10P <sub>2</sub> O <sub>5</sub> -7.5BaO-7.5CdO-1Sm <sub>2</sub> O <sub>3</sub> (x=0, 10, 20, 30 and 40 wt%) Glass Systems                                                      | It was observed by Othman that all results for various samples demonstrated that the intensity of gamma-ray was reduced with the ascent in the density of concrete and the stiffness of concrete ascent as the composition of lead rising.<br>Qian et al. investigated the effect of PbO content on the gamma-ray attenuation coefficients of Sm <sup>3+</sup> doped (60-x)B <sub>2</sub> O <sub>3</sub> -xPbO-14TeO <sub>2</sub> -10P <sub>2</sub> O <sub>5</sub> -7.5BaO-7.5CdO-1Sm <sub>2</sub> O <sub>3</sub> (x=0, 10, 20, 30, and 40 wt%) glass system among 0.02–10 MeV photon energy range and simulation results are fine harmony with the theoretical XCOM calculations in this work, the outcomes demonstrate that the increasing percentage of lead oxide in the glass combinations can develop the gamma-ray shielding capacity of the investigated glasses. |
| Alotaibi, B.M.; et al. [34] | 40P <sub>2</sub> O <sub>5</sub> -20CaO-(30-x)Na <sub>2</sub> O-10K <sub>2</sub> O-xPbO Glass Systems (x = 0, 5, 10, 15, 20 mol%)                                                                                                                                    | Alotaibi et al. prepared the glasses of composition of 40P <sub>2</sub> O <sub>5</sub> -20CaO-(30-x)Na <sub>2</sub> O-10K <sub>2</sub> O-xPbO (for x = 0, 5, 10, 15, and 20 mol%), observed the physical properties and the optical properties, and found to be influenced by the combination of the PbO, their results indicate that PbP5, the glass with the biggest lead oxide content, has the greatest linear attenuation coefficient at all examined energy regions, and thus the best shielding potentiality.                                                                                                                                                                                                                                                                                                                                                      |
| Alzahrani et al. [35]       | PbO-B <sub>2</sub> O <sub>3</sub> -ZnO Glass Systems (40PbO-50B <sub>2</sub> O <sub>3</sub> -10ZnO, 30PbO-50B <sub>2</sub> O <sub>3</sub> -10Bi <sub>2</sub> O <sub>3</sub> -10ZnO, 20PbO-50B <sub>2</sub> O <sub>3</sub> -20Bi <sub>2</sub> O <sub>3</sub> -10ZnO) | Alzahrani et al. investigated that the influence of altering PbO with Bi <sub>2</sub> O <sub>3</sub> on the physical, mechanical, and radiation shielding characteristics of a PbO-B <sub>2</sub> O <sub>3</sub> -ZnO glass system and found that the results of the radiation shielding calculations for the changing of PbO with Bi <sub>2</sub> O <sub>3</sub> a little bit reduced the radiation shielding competence.                                                                                                                                                                                                                                                                                                                                                                                                                                                |

|                             |                                                                                                                                                         |                                                                                                                                                                                                                                                                                                                                                                                                                                                                                                                                                                                                                    |
|-----------------------------|---------------------------------------------------------------------------------------------------------------------------------------------------------|--------------------------------------------------------------------------------------------------------------------------------------------------------------------------------------------------------------------------------------------------------------------------------------------------------------------------------------------------------------------------------------------------------------------------------------------------------------------------------------------------------------------------------------------------------------------------------------------------------------------|
| El-Mallawany et al. [36]    | $\{[(\text{TeO}_2)_{0.7}-(\text{PbO})_{0.3}]_{1-x}(\text{ZnO})_x\}$ $(x=0.15-0.25 \text{ mol}\%)$ Glass Combinations                                    | <p>El-Mallawany et al. studied the influence of PbO and TeO<sub>2</sub> composition on the photon, fast neutron, and charged particles shielding ability of the triple ZnO-PbO-TeO<sub>2</sub> glass combinations with the form <math>[(\text{TeO}_2)_{0.7}-(\text{PbO})_{0.3}]_{1-x}(\text{ZnO})_x</math> (for <math>x=0.15-0.25 \text{ mol}\%</math>) glass structure and they found that these samples can also be a beneficial shielding material for fast neutrons and alpha-proton particles and will be beneficial in the probable application of Te-based glasses for shielding applications.</p>          |
| Al-Harby et al. [37]        | $\{40\text{P}_2\text{O}_5-20\text{CaO}-(30-x)\text{Na}_2\text{O}-10\text{K}_2\text{O}-x\text{PbO}\}$ $(x=0, 5, 10, 15, 20 \text{ mol}\%)$ Glass Systems | <p>Al-Harby et al.'s study is about the synthesis, physical, structural, and gamma-ray shielding characteristics of <math>40\text{P}_2\text{O}_5-20\text{CaO}-(30-x)\text{Na}_2\text{O}-10\text{K}_2\text{O}-x\text{PbO}</math> (for <math>x=0, 5, 10, 15, 20 \text{ mol}\%</math>) glasses and they found that the sample' shielding strength improved as PbO content ascended and the calculated radiation shielding coefficients of the samples illustrated that they possess a decent potential for radiation shielding implementations.</p>                                                                   |
| Al-Buriah et al. [38]       | $50\text{GeO}_2-(50-x)\text{PbO}-x\text{ZnO}$ $(x=0, 10, 20, 30, 40, 50 \text{ mol}\%)$                                                                 | <p>Al-Buriah et al. researched that on the effects of reducing PbO content on the elastic and radiation shielding properties of germanate glasses described by the chemical formula <math>50\text{GeO}_2-(50-x)\text{PbO}-x\text{ZnO}</math> (where <math>x</math> values change between 0 and 50 mol % with the step of 10) and they found that these glass samples have high photon absorbing skill compared to standard and barite concrete, their results illustrated that the <math>\text{GeO}_2\text{-PbO-ZnO}</math> glass structure can be used as a non-toxic shielding matter in nuclear facilities.</p> |
| Almuqrin, A.H.; et al. [57] | $\text{PbO-WO}_3\text{-Na}_2\text{O-MgO-B}_2\text{O}_3$ Glasses                                                                                         | <p>Almuqrin et al.'s results demonstrated that the rising of PbO ingredients of substances had an affirmative influence on shielding substances' efficiency.</p>                                                                                                                                                                                                                                                                                                                                                                                                                                                   |

**Table S10.** Comparative informations of boron-doped radiation shielding characteristics.

| Authors             | Sample Information                                                                                                                                                                              | Main Consequences                                                                                                                                                                                                                                                                                                                                                                                                                                                                                                                                                                              |
|---------------------|-------------------------------------------------------------------------------------------------------------------------------------------------------------------------------------------------|------------------------------------------------------------------------------------------------------------------------------------------------------------------------------------------------------------------------------------------------------------------------------------------------------------------------------------------------------------------------------------------------------------------------------------------------------------------------------------------------------------------------------------------------------------------------------------------------|
| This research       | PS-PEG (1000-1500-10,000)-S <sub>0,1,2,3,4</sub><br>PS-PEG (1000-1500-10,000)-BN-S <sub>0,1,2,3</sub>                                                                                           | It was observed that the implemented radiation does not influence the structure of the materials and the radiation protection capacities of the samples improved when the PbO or BN, and PS-b-PEG copolymer percentages of the prepared materials were changed.                                                                                                                                                                                                                                                                                                                                |
| Stalin et al. [39]  | 20Li <sub>2</sub> O-(20-x)Bi <sub>2</sub> O <sub>3</sub> -xWO <sub>3</sub> -60B <sub>2</sub> O <sub>3</sub><br>(x=0, 1, 2, 3, 4, 5 mol%)                                                        | Stalin et al. researched the optical, mechanical, chemical durability, and gamma irradiation shielding characteristics of six different lithium bismuth boro-tungstate glass samples with chemical structure 20Li <sub>2</sub> O-(20-x)Bi <sub>2</sub> O <sub>3</sub> -xWO <sub>3</sub> -60B <sub>2</sub> O <sub>3</sub> (x=0, 1, 2, 3, 4, 5 mol%) and they found that LBWB glass materials could be used in high energy nuclear radiation exposure are such as nuclear research institution, nuclear energy production centers and many other places for radiation shielding implementations. |
| Algrade et al. [40] | {(100-x)[20Li <sub>2</sub> O-10ZnO-20B <sub>2</sub> O <sub>3</sub> -50P <sub>2</sub> O <sub>5</sub> ]-xNd <sub>2</sub> O <sub>3</sub> }<br>(x=0.0 [LZBP:0.0Nd] wt%)<br>(x=4.0 [LZBP:4.0Nd] wt%) | Algrade et al. investigated that Lithium-zinc-borophosphate glasses with the composition of (100-x)[20Li <sub>2</sub> O-10ZnO-20B <sub>2</sub> O <sub>3</sub> -50P <sub>2</sub> O <sub>5</sub> ]-xNd <sub>2</sub> O <sub>3</sub> (here x = 0.0 (LZBP:0.0Nd) to 4.0 (LZBP:4.0Nd) wt%) and found that the glass LZBP:4.0Nd has the lowest half value layer and hence the high shielding ability for gamma radiations.                                                                                                                                                                            |
| Jiao et al. [41]    | Hexagonal Boron Nitride ( <i>h</i> -BN)<br><i>h</i> -BN/EP Composites                                                                                                                           | Jiao et al. said that to improve the radiation resistance of epoxy resin is important to illustrate the reliability of equipment and the safety of facilities in the nuclear industry, their results showed that the blending with <i>h</i> -BN ascent the radiation resistance characteristics of epoxy resin and the neutron shielding capability.                                                                                                                                                                                                                                           |
| Fu et al. [42]      | Polymer-Based Composites, High-Density Concrete, Heavy Metals, Paraffin, and Other Neutron Shielding Materials with Additives ( <i>h</i> -BN, B <sub>4</sub> C,                                 | Fu et al. reviewed the newest neutron shielding substances for the storage of nuclear fuel waste including contributions such as boron carbide (B <sub>4</sub> C), boron nitride                                                                                                                                                                                                                                                                                                                                                                                                               |

---

Boric Acid, Colemanite, Cd, Gd,  $\text{Sm}_2\text{O}_3$  (BN), boric acid ( $\text{H}_3\text{BO}_3$ ), and colemanite.

Fillers

They provided a theoretical groundwork for the optimization scheme and experimental arrangement of neutron shielding materials.

---
